# Supplementary material for: Deciphering the Translation Initiation Factor 5A Modification Pathway in Halophilic Archaea
Source: Hindawi journal article supplement (doi:10.1155/2016/7316725), 2016-01-01
Supplement: f1 [file 7316725.f1.pdf]

**Supporting information: Deciphering the Translation Initiation Factor 5A Modification Pathway in *Halophilic Archaea***

**Authors:** Laurence Prunetti<sup>1</sup>, Michael Graf <sup>2</sup>, Ian K. Blaby<sup>1#</sup>, Lauri Peil<sup>3</sup>, Andrea M Makkay<sup>4</sup>, Agata L Starosta<sup>2%</sup>, R Thane Papke<sup>4</sup>, Tairo Oshima<sup>5</sup>, Daniel N Wilson<sup>2</sup> and Valérie de Crécy-Lagard<sup>1\*</sup>

<sup>1</sup>Department of Microbiology and Cell Science, Institute for Food and Agricultural Sciences and Genetic Institute, University of Florida, P.O. Box 110700, Gainesville, FL 32611-0700, USA.

<sup>2</sup> Gene Center and Department for Biochemistry, University of Munich, 81377 Munich, Germany; Center for Integrated Protein Science Munich, University of Munich, 81377 Munich, Germany

<sup>3</sup> Faculty of Science and Technology, Institute of Technology, University of Tartu, Tartu, Estonia

<sup>4</sup>Department of Molecular and Cell Biology, University of Connecticut, 91 N. Eagleville Rd, Storrs, CT, 06269, USA.

<sup>5</sup> Institute of Environmental Microbiology, Kyowa Kako Co. Ltd., Tadao 2-15-5, Machida 194-0035, Japan

# Current address: Biology Department, Brookhaven National Laboratory, 50 Bell Avenue, Building 463, Upton, NY 11973, USA

%Current address: Centre for Bacterial Cell Biology, Institute for Cell and Molecular Biosciences, University of Newcastle, Newcastle upon Tyne, United Kingdom

\*To whom correspondence should be addressed.

|                                                           | Agm  | Spd  | Spm  | Put  | Cad  | Hspd | Ref |
|-----------------------------------------------------------|------|------|------|------|------|------|-----|
| <b>Euryarchaeota</b>                                      |      |      |      |      |      |      |     |
| <i>Halorubrum lacusprofondi</i> JCM 8891 <sup>#</sup>     | 2.20 | -    | -    | 1.20 | -    | -    | [1] |
| <i>Halorubrum saccharovororum</i> JCM 8865 <sup>#</sup>   | 4.80 | -    | -    | 0.65 | -    | -    | [1] |
| <i>Halobacterium salinarium</i> JCM 8978 <sup>#</sup>     | 1    | -    | -    | 0.20 | -    | -    | [1] |
| <i>Halorubrum sodomense</i> JCM 8880 <sup>#</sup>         | 2.60 | -    | -    | -    | -    | -    | [1] |
| <i>Halorubrum trapanicum</i> JCM 8979 <sup>#</sup>        | 1.50 | -    | -    | 0.10 | -    | -    | [1] |
| <i>Halobacterium salinarum</i> NCIMB 786 <sup>#</sup>     | 6.10 | -    | -    | -    | -    | -    | [1] |
| <i>Halobacterium salinarum</i> ATCC 43214 <sup>#</sup>    | 8    | -    | -    | 0.10 | -    | -    | [1] |
| <i>Haloarcula hispanica</i> JCM 8911 <sup>#</sup>         | 3.80 | -    | -    | 0.10 | -    | -    | [1] |
| <i>Haloarcula aidinensis</i> JCM 10024 <sup>#</sup>       | 1.60 | -    | -    | -    | 0.10 | -    | [2] |
| <i>Haloarcula japonica</i> JCM 7785 <sup>#</sup>          | 1.20 | -    | -    | -    | -    | -    | [1] |
| <i>Haloarcula marismortui</i> JCM 8966 <sup>#</sup>       | 4.50 | -    | -    | -    | -    | -    | [1] |
| <i>Haloarcula quadrata</i> JCM 11048 <sup>#</sup>         | 0.70 | -    | -    | -    | 0.05 | -    | [2] |
| <i>Haloarcula vallismorits</i> JCM 8877 <sup>#</sup>      | 1.50 | -    | -    | -    | -    | -    | [1] |
| <i>Haloferax denitrificans</i> ATCC 35960 <sup>#</sup>    | 2.20 | -    | -    | -    | -    | -    | [1] |
| <i>Haloferax gibbonsii</i> ATCC 33959 <sup>#</sup>        | 1    | -    | -    | -    | -    | -    | [1] |
| <i>Haloferax mediterranei</i> JCM 8866 <sup>#</sup>       | 2    | -    | -    | -    | -    | -    | [1] |
| <i>Haloferax volcanii</i> NCIMB 2012 <sup>#</sup>         | 4.50 | -    | -    | 0.10 | -    | -    | [1] |
| <i>Halococcus morrhuae</i> ATCC 17082 <sup>#</sup>        | 2.10 | -    | -    | -    | -    | -    | [1] |
| <i>Halococcus saccharolyticus</i> ATCC 49257 <sup>#</sup> | 4.50 | -    | -    | -    | -    | -    | [1] |
| <i>Haloterrigena thermotolerans</i>                       | 1.90 | -    | -    | -    | 0.07 | -    | [2] |
| <i>Natronobacterium gregoryi</i> NCIMB 2189 <sup>#</sup>  | 0.40 | 0.70 | 0.10 | 0.4  | -    | -    | [1] |
| <i>Natronomonas pharaonis</i> JCM 8858 <sup>#</sup>       | 0.60 | -    | -    | 0.10 | -    | -    | [1] |
| <i>Halorubrum vacuolatum</i> JCM 9060 <sup>#</sup>        | 1.20 | 5.30 | 0.30 | 0.10 | -    | -    | [1] |
| <i>Natronococcus occultus</i> JCM 8859 <sup>#</sup>       | 0.40 | -    | -    | 0.20 | -    | -    | [1] |
| <i>Natrialba magadii</i> NCIMB 2190 <sup>#</sup>          | 0.30 | 0.60 | 0.10 | 0.50 | -    | -    | [1] |
| <i>Ferroplasma acidophilum</i> JCM 10970 <sup>\$</sup>    | 0.17 | 1.50 | -    | -    | -    | -    | [3] |

|                                                          |      |      |       |       |      |      |     |
|----------------------------------------------------------|------|------|-------|-------|------|------|-----|
| <i>Thermoplasma acidiphilium</i> JCM 9062 <sup>\$</sup>  | 0.03 | 1    | -     | -     | -    | -    | [3] |
| <i>Thermoplasma volcanium</i> JCM 9571 <sup>\$</sup>     | 0.13 | 1.2  | -     | -     | -    | -    | [3] |
| <i>Thermococcus zilligii</i> JCM10554 <sup>\$</sup>      | 0.15 | 0.82 | -     | -     | -    | -    | [3] |
| <i>Thermococcus waiotapuensis</i> JCM10985 <sup>\$</sup> | 0.10 | 1.24 | 0.02  | 0.04  | -    | -    | [3] |
| <i>Thermococcus aegaeus</i> JCM10828 <sup>\$</sup>       | 0.10 | 1.40 | 0.10  | 0.26  | -    | -    | [3] |
| <i>Pyrococcus glycovorans</i> AL585 <sup>\$</sup>        | 0.06 | 0.80 | -     | -     | -    | -    | [3] |
| <i>Pyrococcus furiosus</i> JCM8422 <sup>\$</sup>         | -    | 0.06 | 0.15  | 0.06  | -    | -    | [3] |
| <i>Pyrococcus horikoshii</i> JCM9974 <sup>\$</sup>       | 0.60 | 0.90 | -     | 0.05  | -    | -    | [3] |
| <i>Pyrococcus woesei</i> JCM8421 <sup>\$</sup>           | -    | 0.28 | -     | 0.16  | -    | -    | [3] |
| <i>Methanococcus vannieli</i> <sup>\$</sup>              | 0.16 | 0.76 | 0.07  | 0.07  | -    | -    | [4] |
| <i>Methanococcus vannieli</i> <sup>%</sup>               | -    | 28.5 | -     | 3.40  | -    | -    | [5] |
| <i>Methanocaldococcus jannaschii</i> <sup>\$</sup>       | 1.50 | 0.60 | 1.50- | 0.04  | -    | -    | [2] |
| <i>Methanosarcina mazei</i> S-6 <sup>%</sup>             | -    | -    | -     | 19.20 | -    | 6.90 | [5] |
| <i>Methanosarcina barkeri</i> MS <sup>%</sup>            | -    | -    | -     | 18.70 | -    | 4.10 | [5] |
| <b>Crenarchaeota</b>                                     |      |      |       |       |      |      |     |
| <i>Sulfolobus tokodaii</i> JCM10545 <sup>\$</sup>        | -    | 1.86 | 0.05  | 0.05  |      | 0.01 | [3] |
| <i>Sulfolobus solfataricus</i> JCM 11322 <sup>\$</sup>   | -    | 1.40 | -     | 0.10  | -    | 0.04 | [3] |
| <i>Metallosphaera sedula</i> JCM 9064 <sup>\$</sup>      | -    | 1.68 | -     | 0.55  | -    | 0.04 | [3] |
| <i>Acidilobus aceticus</i> JCM 11320 <sup>\$</sup>       | -    | 1.51 | -     | 0.10  | -    | -    | [3] |
| <i>Thermodiscus maritimus</i> JCM 11597 <sup>\$</sup>    | -    | 1.15 | -     | 0.32  | 0.12 | -    | [3] |
| <i>Pyrobaculum arsenaticum</i> <sup>\$</sup>             | -    | 1.40 | -     | -     | -    | -    | [3] |
| <i>Pyrobaculum oguniense</i> JCM 10595 <sup>\$</sup>     | -    | 0.85 | 0.55  | -     | -    | -    | [3] |
| <i>Pyrobaculum aerophilum</i> JCM 9630 <sup>\$</sup>     | -    | 0.24 | 0.10  | -     | -    | -    | [3] |
| <i>Pyrobaculum islandicum</i> JCM 9189 <sup>\$</sup>     | -    | 0.85 | 0.50  | -     | -    | -    | [3] |
| <i>Pyrobaculum organotrophum</i> JCM9190 <sup>\$</sup>   | -    | 1.3  | 0.40  | 0.20  | -    | -    | [3] |
| <i>Vulcanisaeta distributa</i> JCM 11212 <sup>\$</sup>   | -    | 0.55 | 0.02  | -     | 0.10 | -    | [3] |
| <i>Vulcanisaeta souniana</i> JCM 11219 <sup>\$</sup>     | -    | 1.80 | 0.02  | -     | -    | -    | [3] |
| <i>Sulfolobus acidocaldarius</i> <sup>\$</sup>           | -    | 1.40 | -     | 0.10  | -    | 0.04 | [3] |

**Table S1: Examples of cellular polyamines detected in archaea.** The table is a non-exhaustive list of polyamines detected in some Archaea. Just the presence of the polyamines agmatine, putrescine, spermidine, spermine, cadaverine and homospermidine were reported in the table. -, non-detected; #, polyamines concentration in nmoles/g wet cell; \$, polyamines concentration in µmoles/g wet cell. %, polyamines concentrations µmol/ g dry cells; Agm, agmatine; Spd, spermidine; Spm, spermine; Put, putrescine; Cad, cadaverine; Hspd, homospermidine; Ref, reference; JCM, Japan Collection of Microorganism; NCIMB, National Collections of Industrial, Marine and Food Bacteria; ATCC, American Type Culture Collection.

| Strain, plasmid             | Phenotype, genotype and/or description <sup>a</sup>                                                                                                                                                                                                                                                                        | Ref/Source |
|-----------------------------|----------------------------------------------------------------------------------------------------------------------------------------------------------------------------------------------------------------------------------------------------------------------------------------------------------------------------|------------|
| <b><i>E. coli</i></b>       |                                                                                                                                                                                                                                                                                                                            |            |
| TOP10                       | F <sup>-</sup> <i>mcrA</i> Δ( <i>mrr-hsdRMS-mcrBC</i> ) Φ80 <i>lacZ</i> Δ <i>M15</i> Δ <i>lacX74</i> <i>recA1</i> <i>araD139</i> Δ( <i>ara leu</i> )7697 <i>galU</i> <i>galK</i> <i>rpsL</i> (Str <sup>r</sup> ) <i>endA1</i> <i>nupG</i>                                                                                  | Invitrogen |
| Inv110                      | F' { <i>tra</i> Δ36 <i>proAB</i> <i>lacIq</i> <i>lacZ</i> Δ <i>M15</i> } <i>rpsL</i> (Str <sup>r</sup> ) <i>thr leu</i> <i>endA</i> <i>thi-1</i> <i>lacY</i> <i>galK</i> <i>galT</i> <i>ara tonA</i> <i>tsx</i> <i>dam</i> <i>dcm</i> <i>supE44</i> Δ( <i>lacproAB</i> ) Δ( <i>mcrC-mrr</i> )102::Tn10 (Tet <sup>r</sup> ) | Invitrogen |
| BL21 (DE3)                  | <i>fhuA2</i> [ <i>lon</i> ] <i>ompT</i> <i>gal</i> (λ <i>DE3</i> ) [ <i>dcm</i> ] Δ <i>hsdS</i> λ <i>DE3</i> = λ <i>sBamHI</i> Δ <i>EcoRI-B</i> <i>int</i> ::( <i>lacI</i> :: <i>PlacUV5</i> :: <i>T7 gene1</i> ) <i>i21</i> Δ <i>nin5</i>                                                                                 | Novagen    |
| Rosetta gammi 2 (DE3)       | Δ( <i>ara-leu</i> )7697 Δ <i>lacX74</i> Δ <i>phoA</i> <i>PvuII</i> <i>phoR</i> <i>araD139</i> <i>ahpC</i> <i>galE</i> <i>galK</i> <i>rpsL</i> (DE3) F'[ <i>lac+</i> <i>lacIq</i> <i>pro</i> ] <i>gor522</i> :: <i>Tn10</i> <i>trxB</i> <i>pRARE2</i> ( <i>CamR</i> , <i>StrR</i> , <i>TetR</i> )                           | Novagen    |
| <b><i>Hfx. volcanii</i></b> |                                                                                                                                                                                                                                                                                                                            |            |
| H26                         | DS70 Δ <i>pyrE2</i>                                                                                                                                                                                                                                                                                                        | [6]        |
| VDC3253                     | H26 Δ <i>HVO_1958</i>                                                                                                                                                                                                                                                                                                      | This work  |
| LSP5061                     | H26 Δ <i>HVO_2299</i> transformed with pLSP21                                                                                                                                                                                                                                                                              | This work  |
| VDC2577                     | H26 <i>TIF5A-C-term His</i> <i>integrant</i>                                                                                                                                                                                                                                                                               | This work  |
| LSP5047                     | H26 transformed with pLSP20                                                                                                                                                                                                                                                                                                | This work  |
| LSP5021                     | H26 transformed with pLSP23                                                                                                                                                                                                                                                                                                | This work  |

## Plasmids

|         |                                                                         |           |
|---------|-------------------------------------------------------------------------|-----------|
| pTA131  | Amp <sup>r</sup> ; ColE1                                                | [6]       |
| pJAM202 | Shuttle vector Amp <sup>r</sup> ; Nv <sup>r</sup>                       | [7]       |
| pIKB298 | Amp <sup>r</sup> ; ColE1; <i>HVO_2299</i> deletion mutant construction  | This work |
| pIKB313 | Amp <sup>r</sup> ; ColE1; <i>HVO_1958</i> deletion mutant construction  | This work |
| pIKB473 | Amp <sup>r</sup> ; ColE1; Tif5a-His-C-term integrant construction       | This work |
| pPT002  | Amp <sup>r</sup> ; Nv <sup>r</sup> ; PJAM202 under ptna promoter        | [8]       |
| pLSP21  | Amp <sup>r</sup> ; Nv <sup>r</sup> ; pPT002 carries <i>HV_22299</i>     | This work |
| pLSP23  | Amp <sup>r</sup> ; Nv <sup>r</sup> ; pJam202 carries <i>T7-His-DHS</i>  | This work |
| pLSP24  | Km <sup>r</sup> ; Pet28 carries <i>Hfx.volcanii aIFA5 C-term-His</i>    | This work |
| pLSP20  | Amp <sup>r</sup> ; Nv <sup>r</sup> ; pJAM202 carries <i>HVO_2297</i>    | This work |
| pMG1    | Km <sup>r</sup> ; pET28 carries <i>T. Kodakarensis aIFA5 N-term-His</i> | This work |
| pMG2    | Km <sup>r</sup> ; pET8 carries <i>S. cerevisiae eIFA5-N-term-His</i>    | This work |
| pMG3    | Km <sup>r</sup> ; pET28 carries <i>T. kodakarensis dhs-N-term-His</i>   | This work |
| pMG4    | Km <sup>r</sup> ; pET28 carries <i>S. cerevisiae dhs-N-term-His</i>     | This work |
| pAS1    | Amp <sup>r</sup> ; pET21b carries <i>E.coli SpeA-C-term-His</i>         | This work |

**Table S2.** List of strains and plasmids used in this study. <sup>a</sup>Abbreviations: Amp<sup>r</sup>, ampicillin resistance; Nv<sup>r</sup>, novobiocin resistance ; Km<sup>r</sup>, kanamycin resistance; *Str*<sup>r</sup>, streptomycin resistance; Tet<sup>r</sup>, tetracycline; Cterm His-, C-terminal poly-His<sub>6</sub> tag fusion protein; T7-His-, N-terminal tandem T7 tag and poly-His<sub>6</sub> tagged protein. The gene encoding aIF5A (*HVO\_2300*) was amplified by PCR using the primers FW NCO1 TIFA and RV TIF5A-Cterm hist (Table S3), and cloned between the *Nco*I and *Bln*I sites of pET28a (+), adding an C-terminal hexa-histidine tag to give the plasmid pLSP24. The gene encoding DHS (*HVO\_2297*) was first subcloned into pET28a (+). Briefly, the plasmid was treated with *Nco*I and *Nde*I to remove the sequence encoding for N-terminal hexa-histidine tag. The extremities were filled with

klenow polymerase (NEB). The gene encoding DHS (*HVO\_2297*) was amplified by PCR using the primers (Table S3) FW Hist HVO\_2297 and RV t7 HVO2297, and cloned between the *Bam*HI and *Blp*I sites of the modified pet28 (+) adding a T7-N-terminal hexa-histidine tag. The sequence of the T7-His-DHS was PCR amplified with the primers FW202 NdeI T7HDHS and RV DHS BlpI (table S3), and cloned between the *Nde*I and *Blp*I sites of pJAM202 to give the plasmid pLSP23. The gene encoding DHS (*HVO\_2297*) was amplified by PCR using the primers FW NdeI DHS and RV DHS BlpI (table S3), and clone between *Nde*I and *Blp*I of pJAM202 to give the plasmid pLSP20. The gene encoding agmatinase-like (*HVO\_2299*) was amplified by PCR using the primers HV 2299 FW and HV 2299 RV, and cloned between *Nde*I and *Bam*HI sited of pPT002 to give the plasmid pLSP21. The sequence of *T. kodakarensis aIF5A* and *S. cerevisiae eIF55* were PCR amplified using the primers aIF5\_Tkod\_FWD, aIF5A\_Tkod\_REV and eIF5A\_Scer\_FWD, eIF5A\_Scer\_REV respectively (table S3), and cloned between the *Sac*I and *Xho*I sites of pET28a (+) adding a N-term poly-His<sub>6</sub> to give the plasmid pMG1 and pMG2. The sequence of *T. kodakarensis dhs* and *S. cerevisiae dhs* were PCR amplified using the primers Dhs\_Tkod\_FWD, Dhs\_Tkod\_REV and Dhs\_Scer\_FWD, Dhs\_Scer\_REV respectively (Table S3), and cloned between the *Eco*RI and *Not*I sites of pET28a (+) adding a N-term poly-His<sub>6</sub> to give the plasmid pMG3 and pMG4. The sequence of speA was PCR amplified using the primers FOR Eco\_speA and RV Eco\_speA and then was cloned into pET21b using Megawhop cloning [9] to generate pAS1.

| Oligonucleotide | Sequence (5'-3')                                          | Function                                                                                  |
|-----------------|-----------------------------------------------------------|-------------------------------------------------------------------------------------------|
| aIF5A_Tkod_FWD  | gatcagagctcatgggagacaagactaagggttcag                      | Amplification of <i>T. Kodakarensis</i> aIF5A gene for subsequent cloning into pET28      |
| aIF5A_Tkod_REV  | cgtatctcgagtcactcgcccctgatcttctttatc                      |                                                                                           |
| Eif5a_HIS_NF    | cgggccccccctcgagcgattctcttccgttcag                        | Amplification of regions surrounding <i>aIIF5</i> ( <i>HVO_2300</i> ) to generate pIKB473 |
| Eif5a_HIS_NR    | ttagtgatggtgatggtgatcggtatcaggaagctgctgacgatcttctgctgcctt |                                                                                           |
| Eif5a_HIS_CF    | agcagcttctgataccgcacatcaccatcactaaacgggggacacagagatgtt    |                                                                                           |
| Eif5a_HIS_CR    | cgggctgcaggaattccgctcagatagacggattgg                      |                                                                                           |

|                     |                                                         |                                                                                    |
|---------------------|---------------------------------------------------------|------------------------------------------------------------------------------------|
| eIF5A_Scer_FWD      | gatcagagctcatgtctgacgaagaacacacctttg                    | Amplification of <i>S.cerevisa</i> eIF5A gene for subsequent cloning into pET28    |
| eIF5A_Scer_REV      | cgtatctcgagttaatcagatcttgagcttccttgaa                   |                                                                                    |
| agmat NF            | cgggccccccctcgaggcctgcccgatgtgaatc                      |                                                                                    |
| agmat NR            | gacgcgttcatatgcgacgtggtggaagtcaacg                      | Amplification of regions surrounding <i>HVO_2299</i> , to generate pIKB298         |
| agmat CF            | gcatatgaacgcgtcgccgagaaggacgtagtcag                     |                                                                                    |
| agmat CR            | cgggctgcaggaattcgacgaccgccatcatgc                       |                                                                                    |
| argDC_NF            | cgggccccccctcgagaagcggacggactcgaag                      | Amplification of regions surrounding <i>HVO_1958</i> , to generate pIKB313         |
| argDC_NR            | gacgcgttcatatgcacatgaacacgattcgct                       |                                                                                    |
| argDC_CF            | gcatatgaacgcgtcctacaccaccgcggtcac                       |                                                                                    |
| argDC_CR            | cgggctgcaggaattcgatctcacgtctgcg                         |                                                                                    |
| Dhs_Scer_FWD        | gatcagaattcccatggatgtccgatatcaacgaaaaactc               | Amplification of <i>S. cerevisae dhs</i> gene for subsequent cloning into pET28    |
| Dhs_Scer_REV        | cgtatgcggccgcttaattcttaactttttgattggtttacc              |                                                                                    |
| Dhs_Tkod_FWD        | gatcagaattcccatggatgaccgagccgaaagatcgtc                 | Amplification of <i>T. kodakarensis dhs</i> gene for subsequent cloning into pET28 |
| Dhs_Tkod_REV        | cgtatgcggccgctcagggggctttcatcacctccac                   |                                                                                    |
| HV 2299 FW          | cggcatcatatgttccccggagcaac                              | To insert <i>HVO_2299</i> into pPT002                                              |
| HV 2299 RV          | aataacggatccttacgaccgcccggcgg                           |                                                                                    |
| ext f               | aagcggacgactcgaag                                       | To check <i>HVO_1958</i> deletion                                                  |
| ext r               | cgacagcgtgagatcgac                                      |                                                                                    |
| FW -391             | atggcgaaagagcagaagcaggtgcgcgag                          |                                                                                    |
| RV -391             | cgaaccagcggctcgtatcggtcgaagt                            | To check <i>HVO_2299</i> deletion                                                  |
| FW NCO1 TIFA        | caacatccatggatggcgaaagagcagaagcaggtg                    | To construct <i>aIF5A C-term His</i>                                               |
| RV TIF5A-Cterm hist | aataacgctcagcttagtgatggtgatggtgatggacgatctttcgtggccttcg |                                                                                    |
| FW Hist HVO_2297    | cggcatggatccagccatcaccaccatc                            | To construct <i>T7-His-DHS</i>                                                     |
| RV t7 HVO2297       | aataacgctcagcttactcgattcgctcgcgccgcgcgac                |                                                                                    |
| FW202 NDe1 T7HDHS   | cggcatcatatggctagcatgactg                               | To insert <i>T7- His-DHS</i> into                                                  |

|              |                                                                   |                                           |
|--------------|-------------------------------------------------------------------|-------------------------------------------|
| RV DHS B1p1  | aataacgctcagcttactcgattcgctcgcg                                   | pJAM202                                   |
| FW Nde1 DHS  | cggcatcatatgagcgaccacgacgat                                       | To insert <i>HVO_2297</i> into<br>pJAM202 |
| RV DHS B1p1  | aataacgctcagcttactcgattcgctcgcg                                   |                                           |
| FOR Eco_speA | gtttaactttaagaaggagatatacatatgtctgacgacatgtctatg<br>ggtttgcc      | To insert <i>speA</i> into pET21          |
| REV Eco_speA | gtgcggccgcaagcttgcgacggagctaaatatctcatcttcaag<br>ataagtataaccgtac |                                           |

**Table S3.** List of primers used in this study.

#### References:

- [1] Hamna, K.; Hamana, H.; Itoh, T. Ubiquitous Occurrence of Agmatine as the Major Polyamine within Extremely Halophilic Archaeobacteria. *J. Gen. Appl. Microbiol.*, **1995**, *41*, 153–158.
- [2] Tanaka T.; Hamana K.; Itoh I. Polyamine Analyses of Extermely Halophilic Archaeobacteria and Methanogenic archaeobacteria. *Ann. Gunma. Health.Sci*, **2002**, *23*, 137-143.
- [3] Hamana, K.; Tanaka, T.; Hosoya, R.; Niitsu, M.; Itoh, T. Cellular Polyarnines of the Acidophilic, Thermophilic and Thermoack Dophilic Archaeobacteria, Acidilobus, Ferroplasma, Pyrobacuium, Pyrococcus, Staphylothermus, Thermococcus, Thermodiscus and Vulcanisaeta. *J. Gen. Appl. Microbiol.*, **2003**, *49*, 287–293.
- [4] Hamana, K.; Hosoya, R.; Itoh, T. Polyamine Analysis of Methanogens, Thermophiles and Extreme Halophiles Belonging to the Domain Archaea. *J. Japanese Soc. Extrem.*, **2007**, *6*, 25–31.
- [5] Scherer, P.; Kneifel, H. Distribution of Polyamines in Methanogenic Bacteria. *J. Bacteriol.*, **1983**, *154*, 1315–1322.
- [6] Allers, T.; Ngo, H.P.; Mevarech, M.; Lloyd, R.G. Development of Additional Selectable Markers for the Halophilic Archaeon Haloferax Volcanii Based on the leuB and trpA Genes. *Appl. Environ. Microbiol.*, **2004**, *70*, 943–953.
- [7] Kaczowka, S.J.; Maupin-Furlow, J.A. Subunit Topology of Two 20S Proteasomes from Haloferax Volcanii. *J. Bacteriol.*, **2003**, *185*, 165–174.
- [8] Blaby, I.K.; Majumder, M.; Chatterjee, K.; Jana, S.; Grosjean, H.; de Crécy-Lagard, V.; Gupta, R. Pseudouridine Formation in Archaeal RNAs: The Case of Haloferax Volcanii. *RNA*, **2011**, *17*, 1367–1380.
- [9] Miyazaki, K. MEGAWHOP Cloning: A Method of Creating Random Mutagenesis Libraries via Megaprimer PCR of Whole Plasmids. *Methods Enzymol.*, **2011**, *498*, 399–406.



A

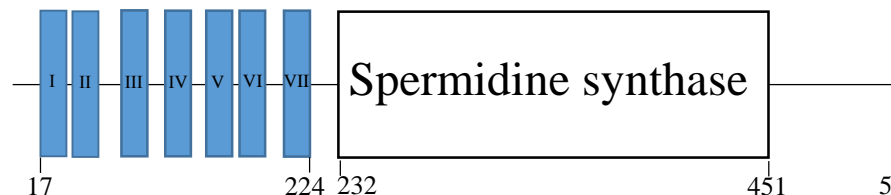

B

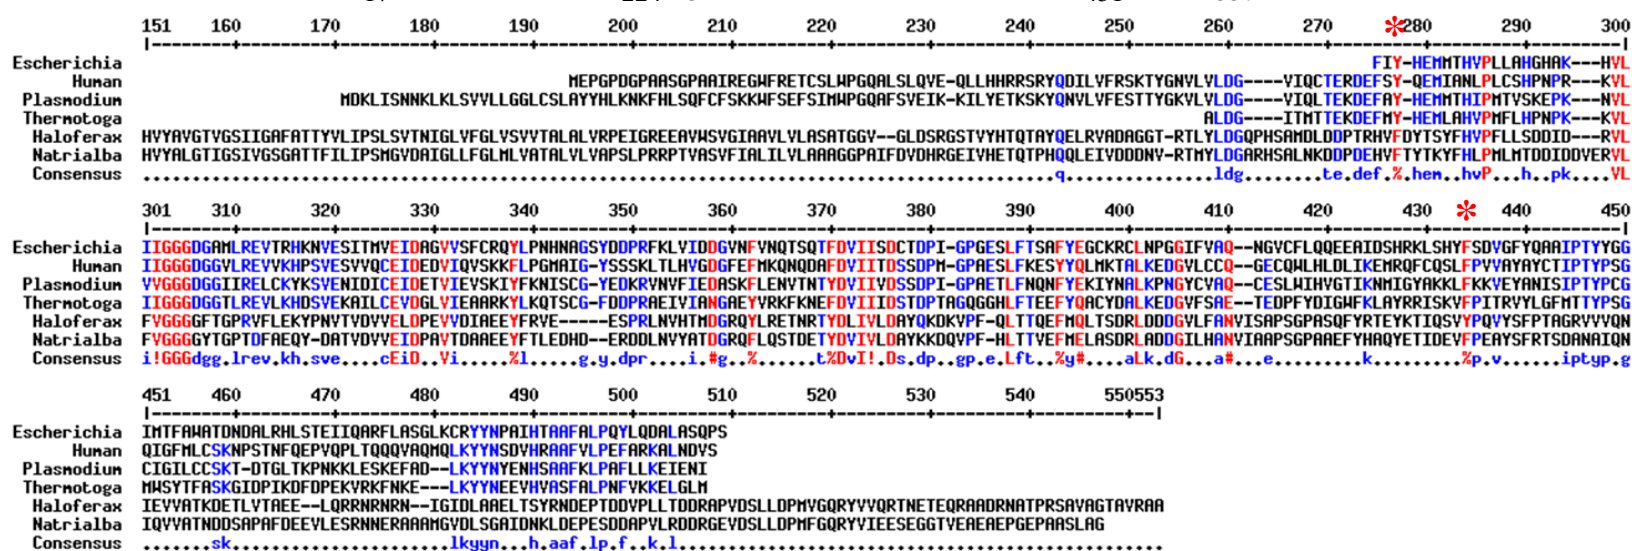

**Fig. S1: Halophile spermidine synthases contain transmembrane regions.** A, prediction of transmembrane regions of HVO\_0225 using TMHMM server v. 2.0. Transmembrane regions are indicated by roman numeral. I starts at amino acid 17 and end at 39; II starts at amino acid 44 and end at 66; III starts at amino acid 78 and end at 100; IV starts at amino acid 115 and end at 137; V starts at amino acid 150 and end at 172; VI starts at amino acid 177 and end at 196; VII starts at amino acid 205 and end at 224. NMAG\_0842 from *Natrialba magadii* ATCC 43099, HTUR\_3004 from *Haloterrigena turkmenica* DSM 5511; HALXA\_2191 from *Halopiger xanaduensis* SH-6; HLRTI\_13355 and HLRTI\_11950 from *Halorhabdus tiamatea* SARL4B contain six to seven transmembrane domains. B, Multiple alignment of spermidine synthases using MultAlin (<http://multalin.toulouse.inra.fr/multalin/>). P09158 is *E.coli* SpeE; P19623 is Human SpeE; Q9WZC2 is *Thermotoga maritima* SpeE; D4GZK0 is *Hfx. volcanii* speE (HVO\_0255); D3T068 is *Natrialba magadii* speE. Strictly conserved residues are in red; similar or partially conserved residues are in blue.

\*putrescine binding site in human SpeE.

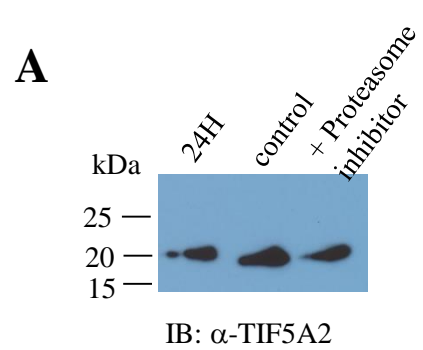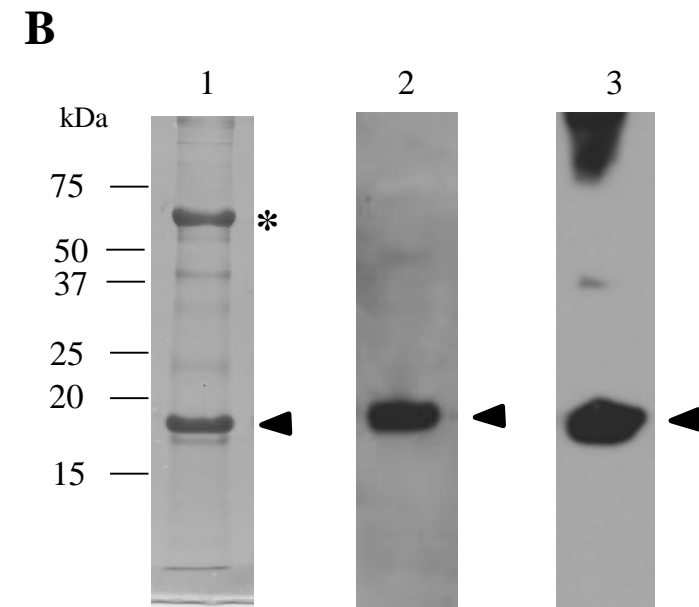

**Fig. S2: No effect of proteasome inhibitor on aIF5A level and purified aIF5A is modified.**

A, Cells were grown for 24 hours and then treated or not treated for 24H with 100  $\mu$ M final bortezomib (proteasome inhibitor). Equivalent protein loading was based on OD600 of cell culture (0.086 OD600 units per lane). Proteins were separated by 4-15% reducing SDS-PAGE. aIF5A was detected via  $\alpha$ -aIF5A (anti-TIF5A2) immunoblot (IB). The molecular mass indicated are in kDa. B, Purified aIF5A (500  $\mu$ l) was mixed with trichloroacetic acid for protein precipitation as described by Sanchez (Sanchez, 2011). After mixing with loading buffer and boiling, proteins were separated by reducing SDS-PAGE 12%. *Lane 1*, the proteins were detected by staining with Coomassie Blue R-250. *Lane 2*, aIF5A was detected by Western blotting raised against C-term His-tag. *Lane 3*, the deoxyhypusine/ hypusine modification was revealed by Western blotting raised against the deoxyhypusine/ hypusine modification (anti UI-88 antibody). Arrowhead indicates aIF5A; \* a non-specific protein (pitA). Molecular mass markers are indicated in kDa.

**A**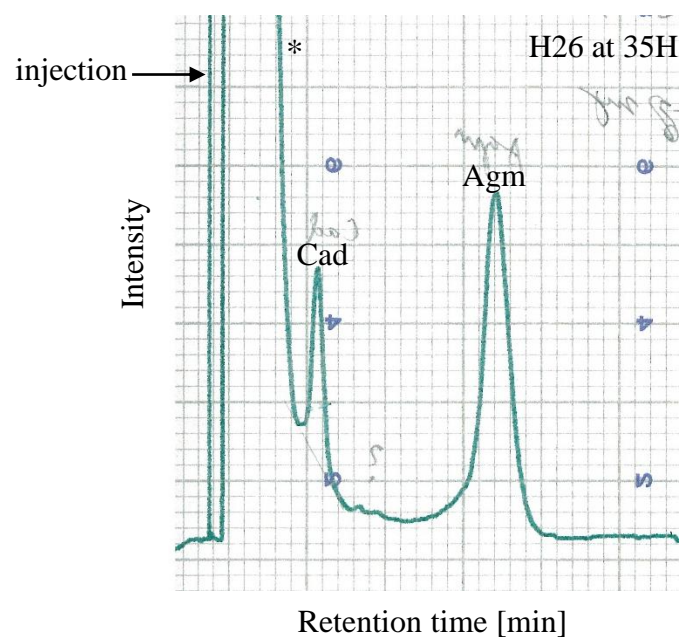**B**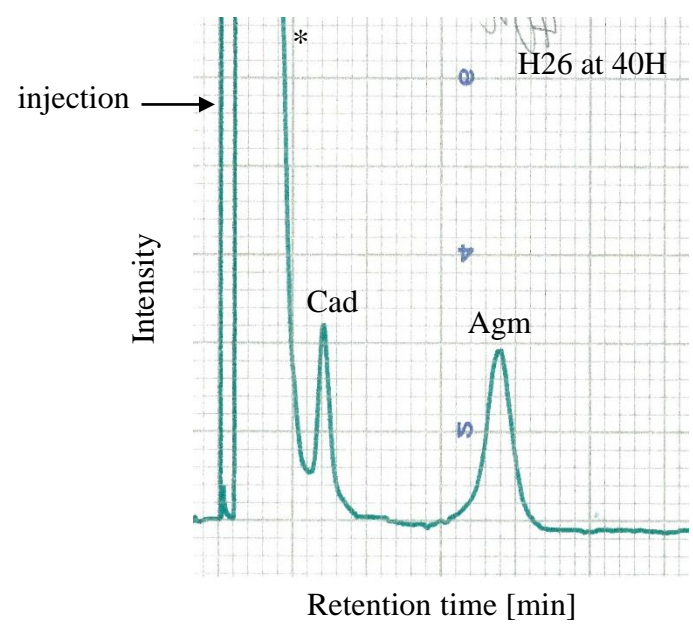

**Fig. S3 : Intracellular polyamines analyzes in *Hfx. volcanii* H26 at 35H and 40H.**

Intracellular polyamines from *Hfx. volcanii* H26 were extracted at different time of the growth. The cells were grown at 42° C in HV\_min medium as described in the Materials and Methods section. A, samples after 35H of growth. Fifty seven mg of extracts were injected. The ratio agmatine/cadaverine is  $12.81 \pm 10.41$ . B, samples after 40H of growth. Twenty six mg of extracts were injected. The ratio agmatine/cadaverine is  $6.93 \pm 5.29$ . The injection is indicated by the arrow; \*, unexpected noise derived from buffer. Standards are shown Fig 4A .

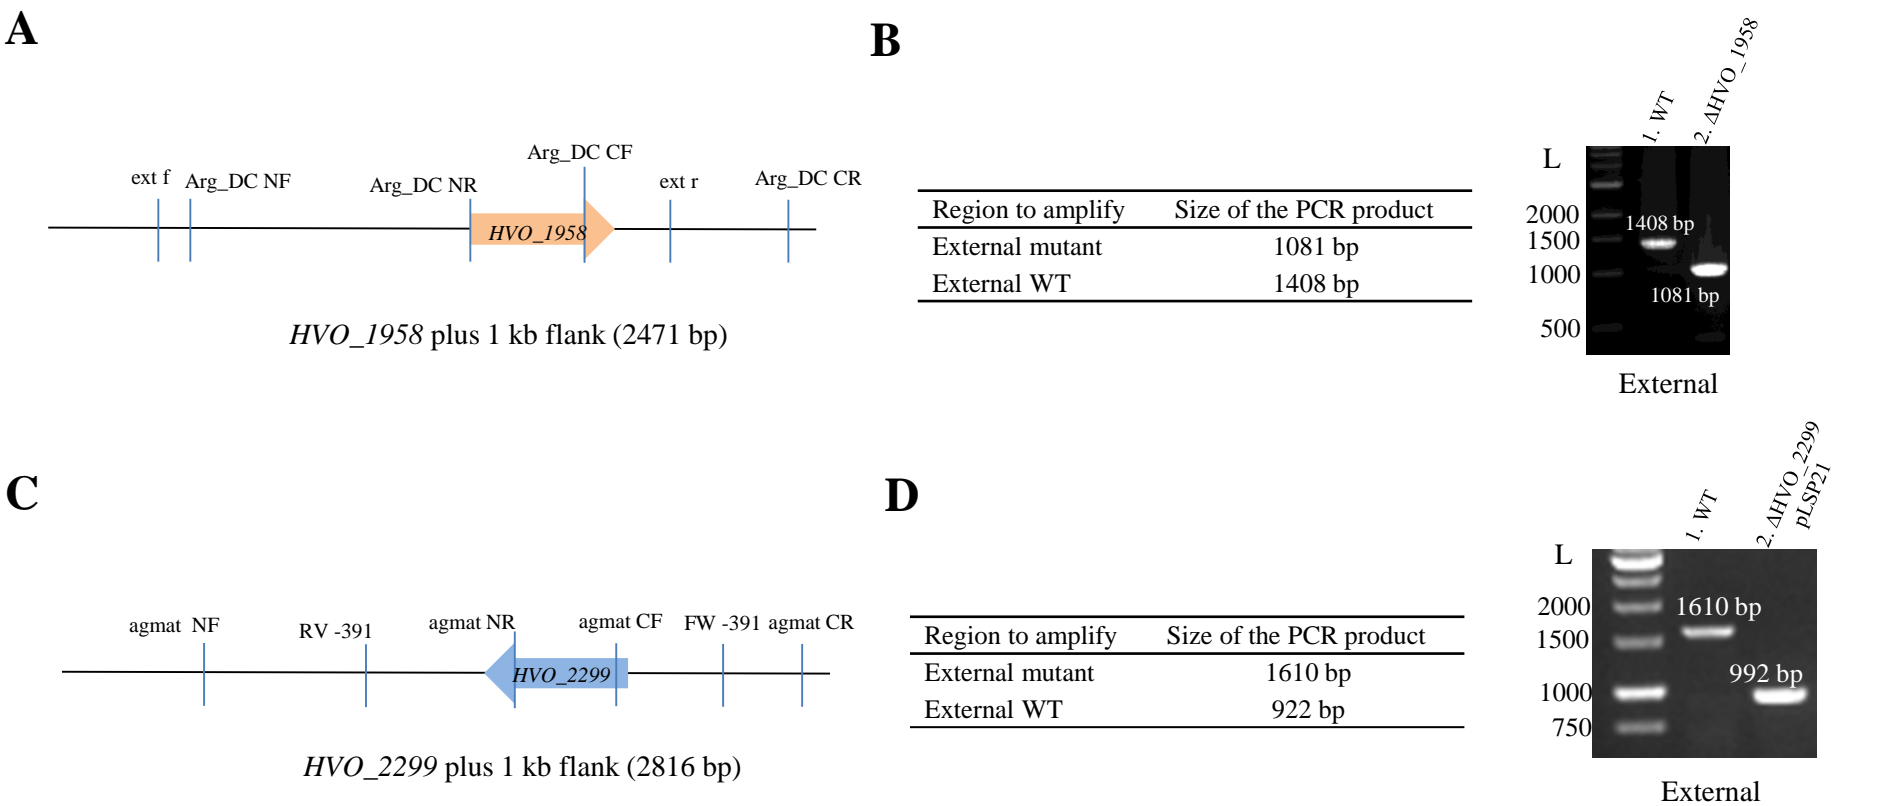

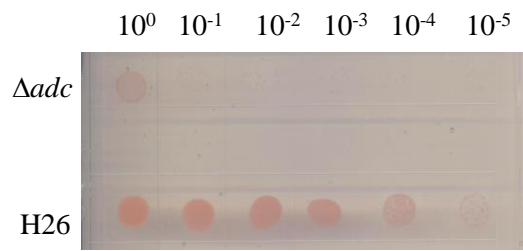

1 mM ornithine

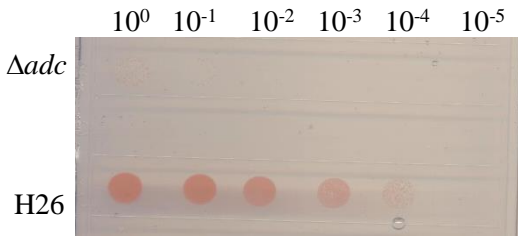

1 mM spermidine

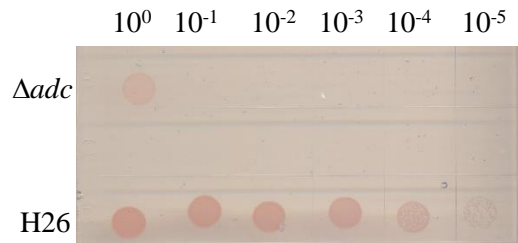

1 mM putrescine

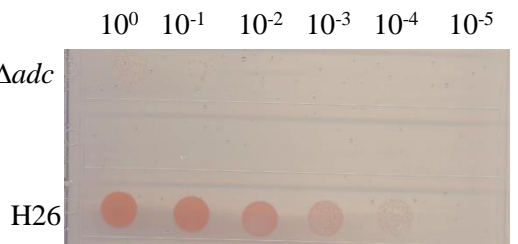

1 mM cadaverine

**Fig. S5: Effect of different polyamines on the growth of *Δadc*.**

*Hfx. volcanii* H26 (WT, parent) and *Δadc* were diluted to an OD<sub>600</sub> of 1 and serial dilutions spot-plated (15 μl) on solid agar Hv\_minimum medium as indicated. Each experiments was performed with two biological replicates and three technical replicates (see methods for description of biological vs. technical replicates).

**A**

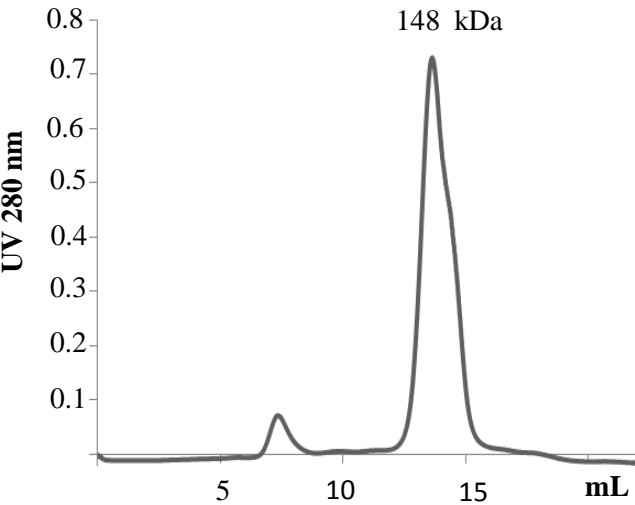

**Fig. S6: Purified T7 His DHS from *Hfx. volcanii*.**

T7-His-DHS purified as a tetramer complex of 148 kDa. A, superdex 200 (10/300 GL) chromatography of T7-HIS-DHS complex. B, 4 mg of T7 His DHS were separated by reducing SDS-PAGE 12% was detected by staining with Coomassie blue-R250. Molecular mass markers are indicated in kDa.

**B**

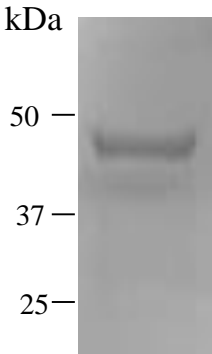

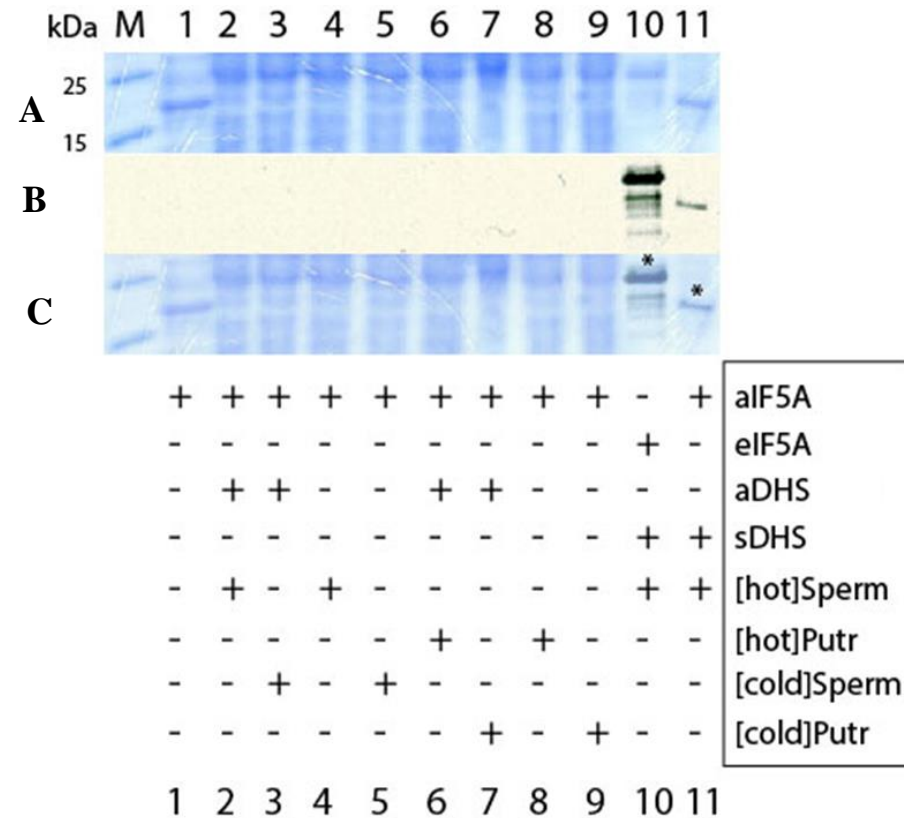

**Fig. S7: Deoxyhypusine synthase assay of *Hfx. volcanii*.**

Detection of *Hfx.volcanii* aIF5A (lane 1, 2, 3, 4, 6, 7, 8, 11) and *S. cerevisiae* eIF5A (lane 10) modification using [ $^{14}\text{C}$ ] spermidine (lane 2, 4, 10, 11) [ $^3\text{H}$ ] putrescine (6, 8), non radioactive spermidine (3, 5) or non radioactive putrescine (7, 9) as substrates in presence of *Hfx. volcanii* DHS (lane 2, 3, 6, 7) or *S. cerevisiae* DHS (lane 10, 11). The *in vitro* assay was resolved on a 16.5 % tricine polyacrylamide gel. The dried gels were exposed to autoradiography films to visualize possible modifications. The assembly of each reaction is depicted above. *A*, Coomassie Blue staining. *B*, Exposed autoradiography film. *C*, Overlay of the Coomassie Blue stained gel and the exposed film. sDHS, Deoxyhypusone synthase of *S. cerevisiae*; aDHS, deoxyhypusine synthase of *Hfx. volcanii*.



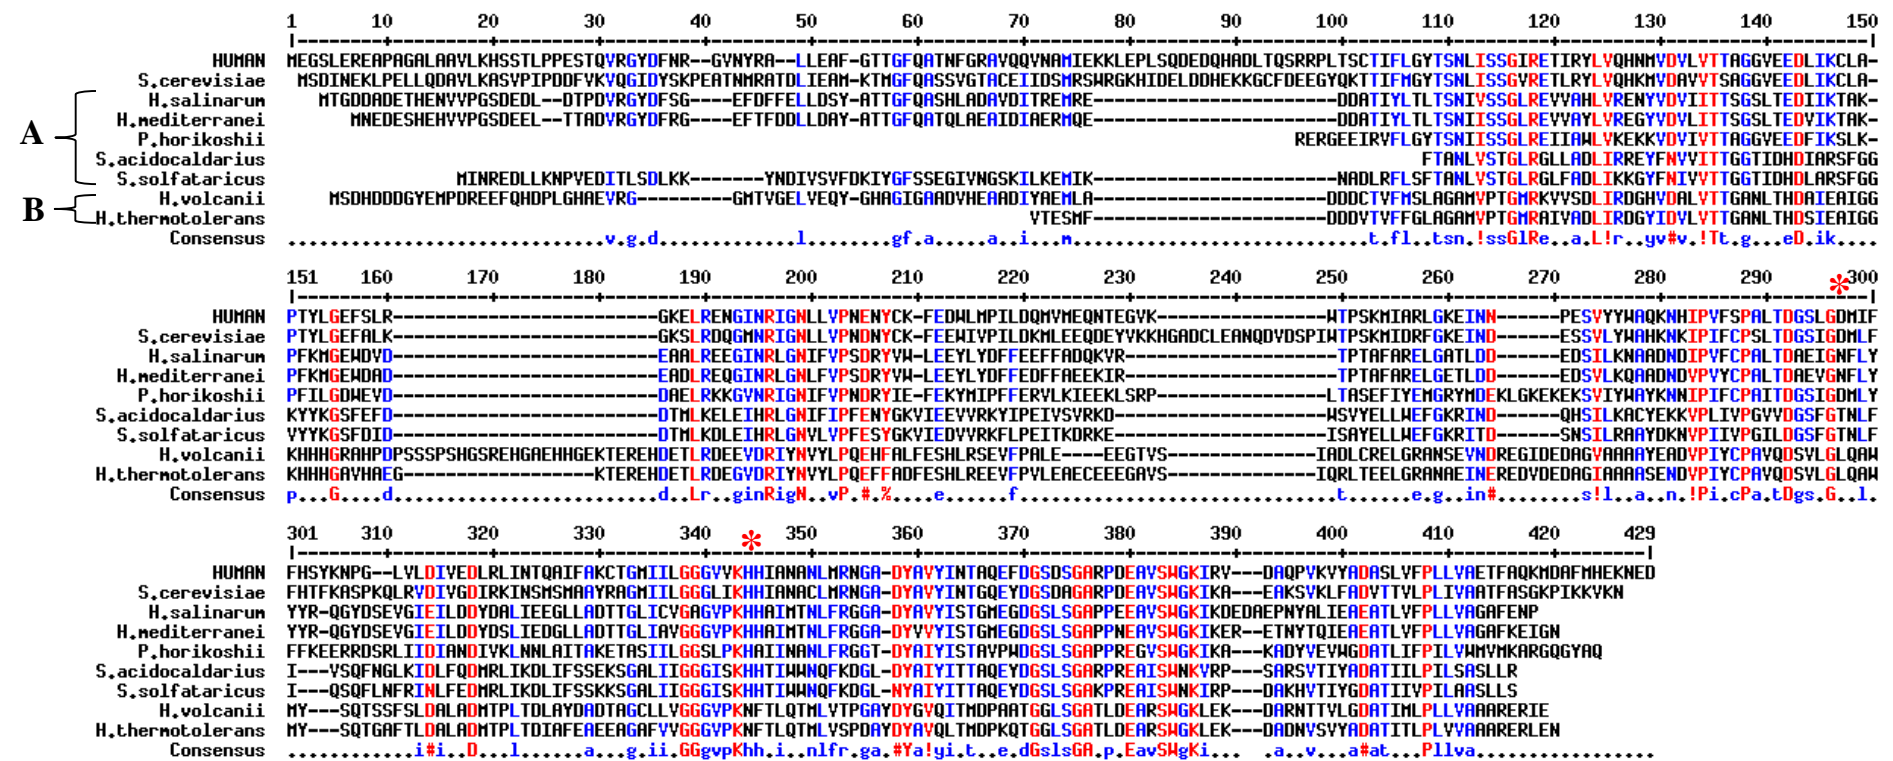

**Fig. S8: Multiple alignment of deoxyhypusine synthase.**

The alignment of DHS was performed using MultAlin (<http://multalin.toulouse.inra.fr/multalin/>). P49366 is Human DHS; P38791 is *Saccharomyces cerevisiae*; O50105 is *Pyrococcus horikoshii*; Q9HPX2IH is *Halobacterium salinarum* (*Halobacterium halobium*); I3RA05 is *Haloferax mediterranei*; Q4J978 is *Sulfolobus acidocaldarius*; Q97ZF1 is *Sulfolobus solfataricus*; D4GW0IH is *Haloferax volcanii*; M0C7L4IH is *Haloterrigena thermotolerans*. Strictly conserved residues are in red; similar or partially conserved residues are in blue. \*spermidine binding site in human DHS and *S. cerevisiae* DHS. A, DHS sequences from Archaea that are sensitive to GC7; B, DHS sequences from halophiles that harbor cadaverine.



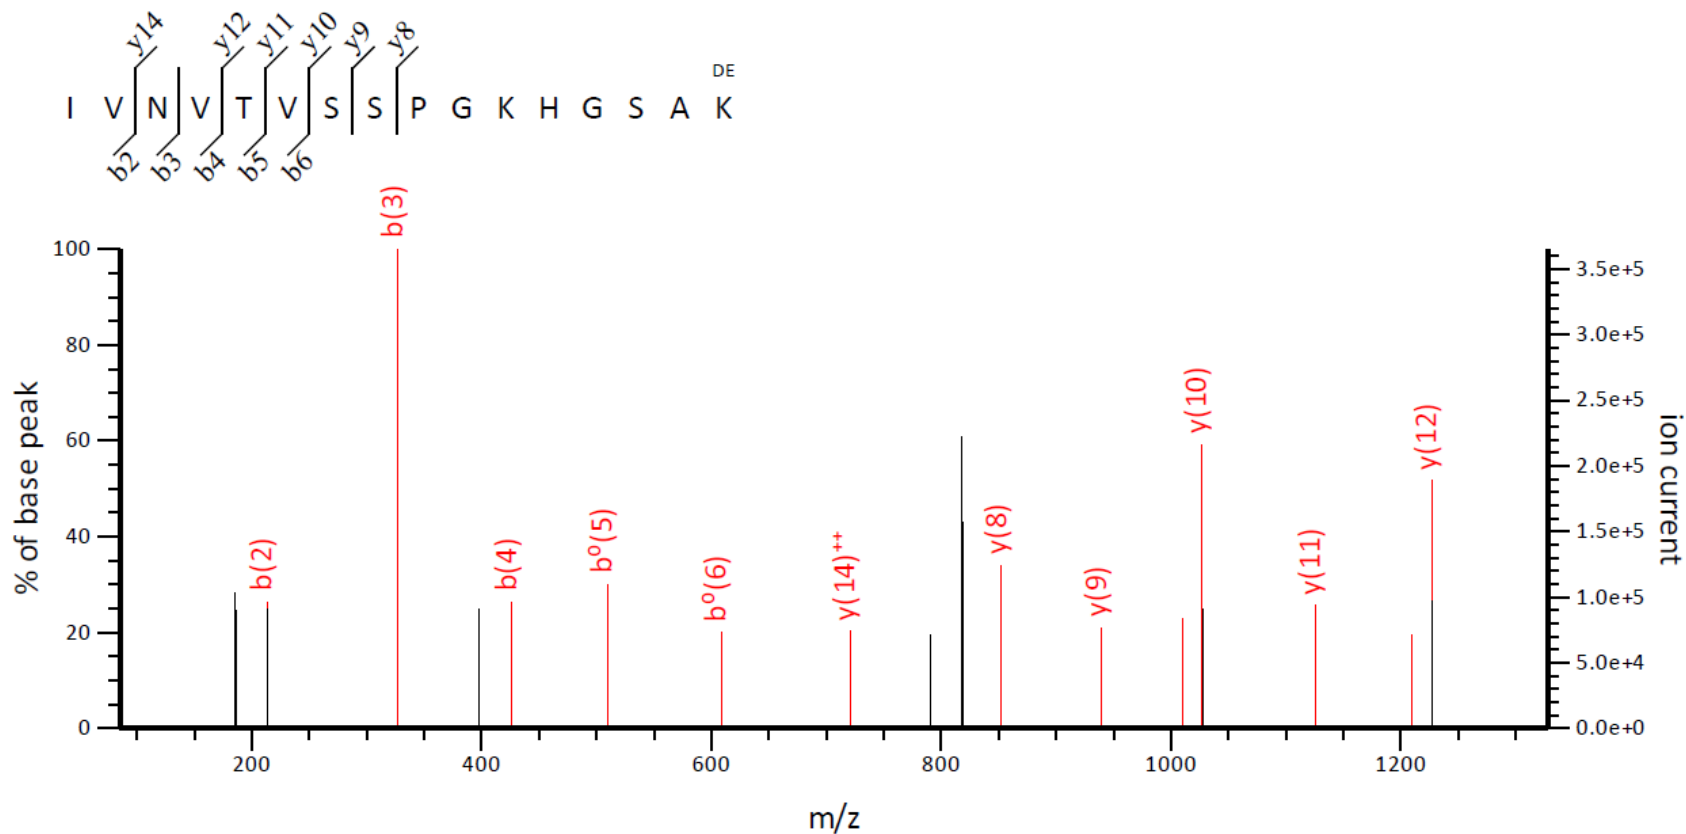

**Fig. S9: Identification of *T. kodakarensis* aIF5A deoxyhypusination by mass spectrometry.**

50 µL of *in vitro* modification sample containing *T. kodakarensis* DHS (2.5 µM) and aIF5A (5 µM) were incubated in 0.2 M Glycine/NaOH (pH 9.4), 2 mM NAD<sup>+</sup> and 50 µM spermidine at 30°C for 2 hours. Subsequently, the samples were analyzed using mass-spectrometry without further treatment. Fragmentation spectrum for deoxyhypusylated peptide IVNVTVSSPGKHGSAK<sub>DE</sub> is shown, xiSPEC (<http://spectrumviewer.org/>) was used for annotation. DE, deoxyhypusine.
